# Supplementary material
Source: MDPI journal article supplement (https://www.mdpi.com/1999-5903/13/7/177)
Supplement: s1 [file s1]

# **Supplementary Information**

## **CoKnowEMe: an Edge Evaluation Scheme for QoS of IoMT Microservices in 6G scenario**

**Grazia Veronica Aiosa<sup>1,\*</sup>, Barbara Attanasio<sup>1</sup>, Aurelio La Corte<sup>1</sup> and Marialisa Scata<sup>1</sup>**

<sup>1</sup> Dipartimento di Ingegneria Elettrica, Elettronica e Informatica, Università di Catania,  
95125, Catania (Italy)

\* corresponding author (veronicaaiosa7@hotmail.it)

<sup>+</sup>these authors contributed equally to this work

**Supplementary Table S1. Acceptability Factors.** The table shows the external factors influencing the acceptability of a service. These factors can be classified in personal, demographic and socio-economic, each of them characterized by several sub elements listed in the Table.

| ACCEPTABILITY FACTORS                                  |                                                                                                                                                                   |                                                                                                                                                                |
|--------------------------------------------------------|-------------------------------------------------------------------------------------------------------------------------------------------------------------------|----------------------------------------------------------------------------------------------------------------------------------------------------------------|
| PERSONAL                                               | DEMOGRAPHIC                                                                                                                                                       | SOCIO-ECONOMIC                                                                                                                                                 |
| Fun [SR1]<br>Enjoyment [SR1]<br>Apprehensiveness [SR1] | Age [45], [SR1], [SR2]<br>Gender [45], [SR1], [SR2]<br>Culture end ethnicity [45], [SR2]<br>Occupation [45], [SR1], [SR2]<br>Education [45], [SR1]<br>Family [45] | Price [SR2]<br>Income [45], [SR1]<br>Social influence (compliance, identification and internalization) [SR3]<br>Social prestige [SR1]<br>Social pressure [SR1] |

**Supplementary Table S2. Usability Factors.** The table displays the external factors influencing the usability of a service which are user, task and use context.

| USABILITY FACTORS                         |                                                         |                                                                   |                                                                    |
|-------------------------------------------|---------------------------------------------------------|-------------------------------------------------------------------|--------------------------------------------------------------------|
|                                           | USER                                                    | TASK                                                              | USE CONTEXT                                                        |
| <b>DEFINITION (ISO 9241-11:2018 [61])</b> | Person who interacts with a system, product or service. | Set of activities undertaken in order to achieve a specific goal. | Combination of users, goals and tasks, resources, and environment. |

**Supplementary Table S3. Acceptability.** The Table shows the acceptability attributes and sub-attributes, which specify it and allow for a more complete evaluation of the service. The table highlights also the relationships between the attributes and sub-attributes.

|                |                 | ACCEPTABILITY ATTRIBUTES |                      |                                  |             |          |          |
|----------------|-----------------|--------------------------|----------------------|----------------------------------|-------------|----------|----------|
|                |                 | Ease of use              | Perceived Usefulness | Compatibility / Interoperability | Reliability | Accuracy | Security |
| SUB-ATTRIBUTES | Availability    |                          |                      |                                  | X           |          | X        |
|                | Recoverability  |                          |                      |                                  | X           |          |          |
|                | Fault tolerance |                          |                      |                                  | X           |          |          |
|                | Robustness      |                          |                      |                                  | X           |          |          |
|                | Integrity       |                          |                      |                                  |             |          | X        |
|                | Confidentiality |                          |                      |                                  |             |          | X        |
|                | Non-repudiation |                          |                      |                                  |             |          | X        |
|                | Authenticity    |                          |                      |                                  |             |          | X        |

**Supplementary Table S4. Usability.** The table shows the relationship existing between attributes and sub-attributes, which are used to evaluate and characterize the service itself. Each attribute can have some associated sub-attributes that specify it and allow for a more complete evaluation.

|                |                | USABILITY ATTRIBUTES |            |              |              |        |                   |
|----------------|----------------|----------------------|------------|--------------|--------------|--------|-------------------|
|                |                | Effectiveness        | Efficiency | Satisfaction | Learnability | Safety | Understandability |
| SUB-ATTRIBUTES | Operability    |                      | X          | X            |              |        |                   |
|                | Attractiveness |                      |            | X            |              |        |                   |
|                | Memorability   | X                    |            |              | X            |        |                   |
|                | Flexibility    | X                    |            | X            |              |        |                   |
|                | Cognitive Load |                      | X          | X            | X            |        |                   |
|                | Error          |                      | X          | X            |              |        |                   |
|                | Simplicity     |                      |            |              | X            |        | X                 |
|                | Accuracy       | X                    |            |              |              | X      |                   |
|                | Privacy        |                      |            |              |              | X      |                   |
|                | Authentication |                      |            |              |              | X      |                   |
|                | Accountability |                      |            |              |              | X      |                   |

**Supplementary Table S5. Acceptability evaluation models.** The table sheds light on the most popular models and the attributes considered to evaluate the acceptability of the service.

| <b>ACCEPTABILITY EVALUATION</b> |                                                                     |                                                                                                                                                              |                                             |
|---------------------------------|---------------------------------------------------------------------|--------------------------------------------------------------------------------------------------------------------------------------------------------------|---------------------------------------------|
| <b>N.</b>                       | <b>EVALUATION MODEL</b>                                             | <b>COMPONENTS</b>                                                                                                                                            | <b>REFERENCES</b>                           |
| 1                               | <b>TAM - Technology Acceptance Model</b>                            | Perceived Usefulness, Perceived Ease of use                                                                                                                  | [28], [SR4], [44], [29], [45], [SR3], [SR1] |
| 2                               | <b>ECM-IT – Expectation Confirmation Model in the context of IT</b> | Perceived Usefulness, Satisfaction                                                                                                                           | [28]                                        |
| 3                               | <b>EECM-IT – Extended ECM-IT</b>                                    | Perceived Usefulness, Perceived Ease of use, Satisfaction                                                                                                    | [28]                                        |
| 4                               | <b>UTAUT – Unified Theory of Acceptance and Use of Technology</b>   | Performance Expectancy, Effort Expectancy, Social Influence, Facilitation, Mediation Factors (Age, Gender, Experience, Voluntariness)                        | [29], [45]                                  |
| 5                               | <b>STAM – Senior Technology Acceptance and Adoption Model</b>       | User Context, Perceived Utility, Intent of use, Experimenting and Exploration, Easy of learning and Use, Useful Utility, Actual Use, Acceptance or Rejection | [29]                                        |
| 6                               | <b>MOTPAM – Mobile Technology Acceptance Models</b>                 | Perceived Usefulness, Perceived Ease of use, Social Influence, Facilitating Condition, Mediation Factors (Demographic, Socio-economic, Personal)             | [29]                                        |
| 7                               | <b>RUTAM - Rural Technology Acceptance Model</b>                    | External Factors, Individual Factors, Perceived Usefulness, Perceived Ease of use                                                                            | [45]                                        |

**Supplementary Table S6. Usability evaluation models.** The table shows the most popular models to evaluate the usability and specify the attributes considered for the evaluation by the different models.

| <b>USABILITY EVALUATION</b> |                                                                              |                                                                                                                                                                                                                      |                             |
|-----------------------------|------------------------------------------------------------------------------|----------------------------------------------------------------------------------------------------------------------------------------------------------------------------------------------------------------------|-----------------------------|
| <b>N.</b>                   | <b>EVALUATION MODEL</b>                                                      | <b>ATTRIBUTES</b>                                                                                                                                                                                                    | <b>REFERENCES</b>           |
| 1                           | <b>ISO 9241-11:2018 [61]</b>                                                 | Effectiveness, Efficiency, Satisfaction                                                                                                                                                                              | [47], [24], [56], [26],[57] |
| 2                           | <b>NIELSEN</b>                                                               | Efficiency, Errors, Satisfaction, Learnability, Memorability                                                                                                                                                         | [26], [56], [57]            |
| 3                           | <b>QUIM - Quality in Use Integrated Map</b>                                  | Factors (Effectiveness, Efficiency, Satisfaction, Productivity, Safety, Internationability, Accessibility), Criteria (Attractiveness, Consistency, Minimal Action, Minimal Memory Load, Completeness), Metrics, Data | [56], [SR5]                 |
| 4                           | <b>PACMAD model - People at the center of Mobile application development</b> | Effectiveness, Efficiency, Satisfaction, Learnability, Memorability, Errors and Cognitive Load                                                                                                                       | [47], [56], [26], [57]      |
| 5                           | <b>GQM - Goal Question Metric</b>                                            | First level (effectiveness, efficiency, satisfaction), Second level (simplicity, accuracy, time spent, features, safety, attractiveness), Third level (questions and metrics)                                        | [47]                        |
| 6                           | <b>MAUEM – Mobile Application Usability Evaluation Metrics</b>               | Efficiency, Effectiveness, Learnability, Memorability, Errors, Satisfaction, Cognitive Workload, Interruptibility, Simplicity                                                                                        | [27]                        |
| 7                           | <b>Mortem Hertzum</b>                                                        | Universal Usability, Situational Usability, Perceived Usability, Hedonic Usability, Organizational Usability, Cultural Usability                                                                                     | [49]                        |

**Supplementary Table S7. Usability evaluation questionnaires.** The table indicates some of the most common usability evaluation questionnaires, specifying also which attributes it is able to evaluate and how many questions it contains. The missing entries (X) indicates that, so far and to the best of our knowledge, there is not enough information in the literature to be able to specify the appropriate field.

| <b>USABILITY EVALUATION</b> |                                                                            |                                                                                                             |                            |                   |
|-----------------------------|----------------------------------------------------------------------------|-------------------------------------------------------------------------------------------------------------|----------------------------|-------------------|
| <b>N.</b>                   | <b>EVALUATION QUESTIONNAIRES</b>                                           | <b>ATTRIBUTES</b>                                                                                           | <b>NUMBER OF QUESTIONS</b> | <b>REFERENCES</b> |
| 1                           | <b>SUS – System Usability Scale</b>                                        | Efficiency, Learnability, Satisfaction                                                                      | 10                         | [58], [56]        |
| 2                           | <b>SUMI – Software Usability Measurement Inventory</b>                     | Efficiency, Learnability, Satisfaction, Helpfulness                                                         | 50                         | [58]              |
| 3                           | <b>CSUQ – Computer System Usability Questionnaire</b>                      | Efficiency, Learnability, Satisfaction, Training, Effectiveness                                             | 7                          | [58], [27]        |
| 4                           | <b>QUIS – Questionnaire User Interaction Satisfaction</b>                  | Satisfaction                                                                                                | 27                         | [58]              |
| 5                           | <b>UMUX – Usability Metric for User Experience</b>                         | Efficiency, Effectiveness, Satisfaction                                                                     | 10                         | [58]              |
| 6                           | <b>ASQ – After Scenario Questionnaire</b>                                  | Helpfulness, Satisfaction, Operability, Human Engineering                                                   | 7                          | [58]              |
| 7                           | <b>SEQ – Single Easy Question</b>                                          | Effectiveness, Satisfaction                                                                                 | 7                          | [58], [44]        |
| 8                           | <b>SMEQ – Subjective Mental Effort Question</b>                            | Satisfaction                                                                                                | 1 (with 9 verb forms)      | [58]              |
| 9                           | <b>WAMMI- Website Analysis and Measurement Inventory</b>                   | Reliability, Efficiency, Understandability, Helpfulness, Learnability, Attractiveness, Usability Compliance | 20                         | [58]              |
| 10                          | <b>SUPR-Q – Standardized User Experience Percentile Rank Questionnaire</b> | Attractiveness, Satisfaction                                                                                | 13                         | [58]              |
| 11                          | <b>UEQ – User Experience Questionnaire</b>                                 | Acceptance, Satisfaction                                                                                    | 26                         | [59]              |
| 12                          | <b>NASA-TLX – NASA Task Load Index</b>                                     | Cognitive Load                                                                                              | X                          | [26]              |

**Supplementary Table S8. User Experience evaluation tool.** The table describes different user experience evaluation tools, indicating, for each of them, the kind of study, the observed period for the evaluation, the number of users who can evaluate the service at the same time and the type of data provided [60].

| <b>N.</b> | <b>EVALUATION TOOL</b>                         | <b>STUDY TYPE</b>                                         | <b>STUDIED PERIOD OF EXPERIENCE</b>    | <b>INFO PROVIDER</b> | <b>DATA</b>               |
|-----------|------------------------------------------------|-----------------------------------------------------------|----------------------------------------|----------------------|---------------------------|
| 1         | <b>Affect Grid</b>                             | Field studies, Lab studies, Online studies, Questionnaire | Before usage, An episode               | One user at a time   | Quantitative              |
| 2         | <b>AttrakDiff</b>                              | Field studies, Lab studies, Online studies, Questionnaire | An episode, Long-term UX               | One user at a time   | Quantitative              |
| 3         | <b>AXE (Anticipated eXperience Evaluation)</b> | Field studies, Lab studies                                | Before usage                           | One user at a time   | Qualitative               |
| 4         | <b>Co-discovery</b>                            | Lab studies                                               | An episode                             | Pairs of users       | Qualitative               |
| 5         | <b>Contextual Laddering</b>                    | Field studies, Lab studies                                | Before usage, An episode, Long-term UX | One user at a time   | Qualitative, Quantitative |
| 6         | <b>Controlled observation</b>                  | Lab studies                                               | Snapshots, An episode                  | One user at a time   | Qualitative, Quantitative |
| 7         | <b>Differential Emotions Scale (DES)</b>       | Field studies, Lab studies, Questionnaire                 | Snapshots, An episode                  | One user at a time   | Quantitative              |
| 8         | <b>EMO2</b>                                    | Field studies, Lab studies                                | An episode                             | One user at a time   | Quantitative              |

|    |                                             |                                                           |                                                   |                                    |                           |
|----|---------------------------------------------|-----------------------------------------------------------|---------------------------------------------------|------------------------------------|---------------------------|
| 9  | <b>Emofaces</b>                             | Field studies, Lab studies, Online studies                | An episode                                        | One user at a time, Pairs of users | Quantitative              |
| 10 | <b>Emotion Cards</b>                        | Field studies, Lab studies, Online studies                | Before usage, Snapshots, An episode, Long-term UX | One user at a time                 | Qualitative, Quantitative |
| 11 | <b>Experience Sampling Method (ESM)</b>     | Field studies                                             | Snapshots, Long-term UX                           | One user at a time                 | Qualitative, Quantitative |
| 12 | <b>Facial EMG</b>                           | Lab studies                                               | Snapshots                                         | One user at a time                 | Qualitative, Quantitative |
| 13 | <b>Geneva Appraisal Questionnaire</b>       | Field studies, Lab studies, Online studies, Questionnaire | Snapshots, An episode                             | One user at a time                 | Quantitative              |
| 14 | <b>Geneva Emotion Wheel</b>                 | Field studies, Lab studies, Online studies, Questionnaire | Snapshots, An episode                             | One user at a time                 | Quantitative              |
| 15 | <b>Hedonic Utility scale (HED/UT)</b>       | Field studies, Lab studies, Online studies, Questionnaire | Snapshots, An episode                             | One user at a time                 | Quantitative              |
| 16 | <b>I.D. Tool</b>                            | Field studies, Lab studies                                | Before usage, An episode, Long-term UX            | One user at a time                 | Qualitative               |
| 17 | <b>Intrinsic motivation inventory (IMI)</b> | Field studies, Lab studies, Online studies, Questionnaire | Snapshots, An episode                             | One user at a time                 | Quantitative              |
| 18 | <b>iScale</b>                               | Lab studies, Online studies                               | Long-term UX                                      | One user at a time                 | Qualitative, Quantitative |
| 19 | <b>Long term diary study</b>                | Field studies, Online studies                             | Long-term UX                                      | One user at a time                 | Qualitative               |
| 20 | <b>Mental effort</b>                        | Field studies, Lab studies, Online studies, Questionnaire | Snapshots, An episode                             | One user at a time                 | Quantitative              |
| 21 | <b>Mindmap</b>                              | Lab studies                                               | Before usage, Snapshots, An episode               | One user at a time                 | Qualitative, Quantitative |
| 22 | <b>PAD</b>                                  | Field studies, Lab studies, Online studies                | Snapshots, An episode                             | One user at a time                 | Quantitative              |
| 23 | <b>PrEmo</b>                                | Field studies, Lab studies, Online studies                | Before usage, Snapshots                           | One user at a time                 | Qualitative, Quantitative |
| 24 | <b>Private camera conversation</b>          | Lab studies                                               | An episode, Long-term UX                          | One user at a time, Pairs of users | Qualitative               |
| 25 | <b>Product Attachment Scale</b>             | Field studies, Online studies                             | Long-term UX                                      | One user at a time                 | Quantitative              |
| 26 | <b>Reaction checklists</b>                  | Lab studies, Online studies                               | An episode                                        | One user at a time                 | Quantitative              |
| 27 | <b>Self-Assessment Manikin (SAM)</b>        | Field studies, Lab studies, Online studies, Questionnaire | Snapshots, An episode                             | One user at a time                 | Quantitative              |
| 28 | <b>Semi-structured experience interview</b> | Field studies, Online studies                             | Before usage, Snapshots, An episode, Long-term UX | One user at a time, Pairs of users | Qualitative               |
| 29 | <b>Sensual Evaluation Instrument</b>        | Lab studies                                               | Snapshots                                         | One user at a time                 | Qualitative, Quantitative |
| 30 | <b>Sentence Completion</b>                  | Lab studies, Online studies                               | Long-term UX                                      | One user at a time                 | Qualitative, Quantitative |
| 31 | <b>This-or-that</b>                         | Field studies, Lab studies                                | Snapshots, An episode                             | One user at a time                 | Qualitative, Quantitative |

|    |                                               |                            |                                                   |                    |                           |
|----|-----------------------------------------------|----------------------------|---------------------------------------------------|--------------------|---------------------------|
| 32 | <b>TRUE Tracking User Realtime Experience</b> | Lab studies                | An episode                                        | One user at a time | Qualitative, Quantitative |
| 33 | <b>UX Curve</b>                               | Lab studies                | Long-term UX                                      | One user at a time | Qualitative, Quantitative |
| 34 | <b>UX laddering</b>                           | Field studies, Lab studies | Before usage, Snapshots, An episode, Long-term UX | One user at a time | Qualitative, Quantitative |
| 35 | <b>Valence method</b>                         | Lab studies                | Snapshots, An episode                             | One user at a time | Qualitative, Quantitative |

**Supplementary Table S9. Acceptability attributes and sub-attributes.** The table describes in detail the set of attributes and sub-attributes related to evaluation of acceptability. In particular, for each of them the table contains the following fields: the evaluation approach (whether objective or subjective), the definition, the used metric, the unit of measurement, the measurement method and the information provided by attributes and sub-attributes. The missing entries (X) indicates that, so far and to the best of our knowledge, there is not enough information in the literature to be able to specify the appropriate field.

| <b>ACCEPTABILITY</b>                    |                                                                                                                                       |                                                                                         |                             |                              |                                                                                                                                                                                                                                           |                                       |
|-----------------------------------------|---------------------------------------------------------------------------------------------------------------------------------------|-----------------------------------------------------------------------------------------|-----------------------------|------------------------------|-------------------------------------------------------------------------------------------------------------------------------------------------------------------------------------------------------------------------------------------|---------------------------------------|
| <b>APPROACH</b>                         | <b>DEFINITION</b>                                                                                                                     | <b>METRIC</b>                                                                           | <b>UNIT OF MEASURE</b>      | <b>METHOD OF MEASUREMENT</b> | <b>INFORMATION</b>                                                                                                                                                                                                                        | <b>REFERENCES</b>                     |
| <b>ATTRIBUTES</b>                       |                                                                                                                                       |                                                                                         |                             |                              |                                                                                                                                                                                                                                           |                                       |
| <b>EASE OF USE</b>                      |                                                                                                                                       |                                                                                         |                             |                              |                                                                                                                                                                                                                                           |                                       |
| Subjective                              | The perceived level of the user's effort related to usage of the application.                                                         | Predefined statements with Likert-scale ranking.                                        | X                           | Survey                       | Ease of use indicates the degree of difficulty or effort that the user experiences while using a particular system, but it can also indicate the degree to which a software product facilitates the control and use of the system itself. | [47], [SR4], [35]                     |
| <b>PERCEIVED USEFULNESS</b>             |                                                                                                                                       |                                                                                         |                             |                              |                                                                                                                                                                                                                                           |                                       |
| Subjective                              | The degree to which a person believes that using a particular technology would enhance his or her job performance.                    | Predefined statements with Likert scale ranking.                                        | X                           | Survey                       | Indicates the ability of a system to be used advantageously by the user to satisfy present or future needs.                                                                                                                               | [28], [SR4]                           |
| <b>COMPATIBILITY / INTEROPERABILITY</b> |                                                                                                                                       |                                                                                         |                             |                              |                                                                                                                                                                                                                                           |                                       |
| Objective                               | Degree to which two or more systems, products or components can exchange information and use the information that has been exchanged. | Ratio between the number of efficient interactions on the number of total interactions. | Percentage of Compatibility | Controlled Observation       | Interoperability or compatibility indicates the ability of two or more systems to work together, without them having to be modified, exchanging information and understanding the                                                         | [55], [35], ISO/IEC 25010:2011 [SR10] |

|                 |                                                                                                                                                                                                       |                                                                                          |                            |                        |                                                                                                                                                                                                                           |                                              |
|-----------------|-------------------------------------------------------------------------------------------------------------------------------------------------------------------------------------------------------|------------------------------------------------------------------------------------------|----------------------------|------------------------|---------------------------------------------------------------------------------------------------------------------------------------------------------------------------------------------------------------------------|----------------------------------------------|
|                 |                                                                                                                                                                                                       |                                                                                          |                            |                        | information exchanged.                                                                                                                                                                                                    |                                              |
| RELIABILITY     |                                                                                                                                                                                                       |                                                                                          |                            |                        |                                                                                                                                                                                                                           |                                              |
| Objective       | Degree to which a system, product or component performs specified functions under specified conditions for a specified period of time.                                                                | Weighted sum of sub-factors (Recoverability, Availability, Fault Tolerance, Robustness). | Percentage of Reliability  | Weighted-Sum           | Indicates the ability of a service to fulfill specific functions, even certain conditions and in a certain time interval.                                                                                                 | [55], [35], ISO/IEC 25010:2011 [SR10]        |
| SECURITY        |                                                                                                                                                                                                       |                                                                                          |                            |                        |                                                                                                                                                                                                                           |                                              |
| Objective       | Degree to which a product or system protects information and data so that persons or other products or systems have the degree of data access appropriate to their types and levels of authorization. | Weighted sum of subfactors (Confidentiality, Integrity, Availability, Non-Repudiation).  | Percentage of Security     | Weighted-Sum           | The Security indicates the set of actions and tools adopted by the system in response to an ongoing threat organized in order to cause damage; thus protecting information and data from unauthorized persons or systems. | [35], [SR6], ISO/IEC 25010:2011 [SR10]       |
| ACCURACY        |                                                                                                                                                                                                       |                                                                                          |                            |                        |                                                                                                                                                                                                                           |                                              |
| Objective       | The degree to which the software product provides the right or specified results with the needed degree of precision.                                                                                 | Ratio between the service that is expected and that which is observed.                   | Percentage of Accuracy     | Controlled Observation | Indicates the correctness, precision and rigor with which the results are provided.                                                                                                                                       | [55], [35]                                   |
| SUB-ATTRIBUTES  |                                                                                                                                                                                                       |                                                                                          |                            |                        |                                                                                                                                                                                                                           |                                              |
| AVAILABILITY    |                                                                                                                                                                                                       |                                                                                          |                            |                        |                                                                                                                                                                                                                           |                                              |
| Objective       | Degree to which a system, product or component is operational and accessible when required for use.                                                                                                   | Service accessibility                                                                    | Seconds                    | Controlled Observation | Indicates the ability of a service to be operational and accessible when it is required for use.                                                                                                                          | [55], [35], [SR6], ISO/IEC 25010:2011 [SR10] |
|                 |                                                                                                                                                                                                       | Uptime percentage of a service during a time interval                                    | Percentage of uptime       |                        |                                                                                                                                                                                                                           |                                              |
|                 |                                                                                                                                                                                                       | Number of availability threats blocked/Number of total threats                           | Percentage of Availability |                        |                                                                                                                                                                                                                           |                                              |
| RECOVERABILITY  |                                                                                                                                                                                                       |                                                                                          |                            |                        |                                                                                                                                                                                                                           |                                              |
| Objective       | Degree to which, in the event of an interruption or a failure, a product or system can recover the data directly affected and re-establish the desired state of the system.                           | CFR (coverage of failure recovery)                                                       | Solved Faults/Total Faults | Controlled Observation | Indicates the ability of a system to recover data and restore the desired state in the event of an outage or failure.                                                                                                     | [55], [35], ISO/IEC 25010:2011 [SR10]        |
| FAULT TOLERANCE |                                                                                                                                                                                                       |                                                                                          |                            |                        |                                                                                                                                                                                                                           |                                              |
| Objective       | Degree to which a system, product or component operates as intended despite                                                                                                                           | MTBF (mean time between failures)                                                        | Seconds                    | Controlled Observation | Indicates the ability of the service to remain reachable and functioning                                                                                                                                                  | [55], [35], ISO/IEC 25010:20                 |
|                 |                                                                                                                                                                                                       | MTTF(mean time to failure)                                                               |                            |                        |                                                                                                                                                                                                                           |                                              |

|                        |                                                                                                                                    |                                                                     |                               |                        |                                                                                                                                |                                              |
|------------------------|------------------------------------------------------------------------------------------------------------------------------------|---------------------------------------------------------------------|-------------------------------|------------------------|--------------------------------------------------------------------------------------------------------------------------------|----------------------------------------------|
|                        | the presence of hardware or software faults.                                                                                       | MTTR (mean time to repair)                                          |                               |                        | even in the event of anomalies or failures.                                                                                    | 11 [SR10]                                    |
|                        |                                                                                                                                    | CFT (coverage of fault tolerance)                                   | Solved Faults/Total Faults    |                        |                                                                                                                                |                                              |
| <b>ROBUSTNESS</b>      |                                                                                                                                    |                                                                     |                               |                        |                                                                                                                                |                                              |
| Objective              | The degree to which an executable work product continues to function properly under abnormal conditions or circumstances.          | Probability of service being affected by the failure.               | Probability of failure        | Controlled observation | Indicates the ability of a system to continue to perform its work even in the event of failures or malfunctions.               | [55], [35]                                   |
| <b>INTEGRITY</b>       |                                                                                                                                    |                                                                     |                               |                        |                                                                                                                                |                                              |
| Objective              | The degree to which a system, product or component prevents unauthorized access to, or modification of, computer programs or data. | Number of integrity threats blocked / Number of total threats       | Percentage of Integrity       | Controlled observation | Indicates the ability of a system to prevent unauthorized users from accessing or modifying applications or data.              | [55], [35], [SR6], ISO/IEC 25010:2011 [SR10] |
| <b>CONFIDENTIALITY</b> |                                                                                                                                    |                                                                     |                               |                        |                                                                                                                                |                                              |
| Objective              | Degree to which a product or system ensures that data are accessible only to those authorized to have access.                      | Number of confidentiality threats blocked / Number of total threats | Percentage of Confidentiality | Controlled observation | Indicates the ability of a system to ensure that data is accessible only to those who are authorized to access it.             | [55], [35], [SR6], ISO/IEC 25010:2011 [SR10] |
| <b>NON-REPUDIATION</b> |                                                                                                                                    |                                                                     |                               |                        |                                                                                                                                |                                              |
| Objective              | The degree to which actions or events can be proven to have taken place, so that the events or actions cannot be repudiated later. | Number of non-repudiation threats blocked / Number of total threats | Percentage of Non-Repudiation | Controlled observation | It indicates the ability to provide evidence of the origin and integrity of data without that someone can deny their validity. | [35], [SR6], ISO/IEC 25010:2011 [SR10]       |
| <b>AUTHENTICITY</b>    |                                                                                                                                    |                                                                     |                               |                        |                                                                                                                                |                                              |
| Objective              | The degree to which the identity of a subject or resource can be proved to be the one claimed.                                     | X                                                                   | X                             | Controlled observation | Indicates the ability to verify the identity of a subject or resource by demonstrating that it is what it claims to be.        | [55], [35], ISO/IEC 25010:2011 [SR10]        |

**Supplementary Table S10. Usability attributes and sub-attributes.** The table describes in detail the set of attributes and sub-attributes used for the evaluation of usability. In particular, for each of them, the table indicates: the type evaluation approach (whether objective or subjective), the definition, the metric used, the unit of measurement, the measurement method, the information retrieved from each attribute and sub-attribute and the questionnaires suitable for evaluation. The missing entries (X) indicate that, so far and to the best of our knowledge, there is not enough information in the literature to be able to specify the appropriate field.

| USABILITY  |            |        |                 |                       |             |                           |            |
|------------|------------|--------|-----------------|-----------------------|-------------|---------------------------|------------|
| APPROACH   | DEFINITION | METRIC | UNIT OF MEASURE | METHOD OF MEASUREMENT | INFORMATION | EVALUATION QUESTIONNAIRES | REFERENCES |
| ATTRIBUTES |            |        |                 |                       |             |                           |            |



| EFFECTIVENESS            |                                                                                                                          |                                                                     |                                                                |                        |                                                                                                                                                                                                  |                                                          |                                                                                 |
|--------------------------|--------------------------------------------------------------------------------------------------------------------------|---------------------------------------------------------------------|----------------------------------------------------------------|------------------------|--------------------------------------------------------------------------------------------------------------------------------------------------------------------------------------------------|----------------------------------------------------------|---------------------------------------------------------------------------------|
| Objective/<br>Subjective | Accuracy and completeness with which users achieve specified goals.                                                      | Task success rate                                                   | Number of successfully completed tasks / Total number of tasks | Survey                 | Indicates a user's ability to achieve specific goals accurately and completely.                                                                                                                  | CSUQ, UMUX, SEQ                                          | [47], [58], [59], [27], [SR7], ISO 9241-11:2018 [61], ISO/IEC 25010:2011 [SR10] |
|                          |                                                                                                                          | The number of steps required to complete a task.                    | Number of steps required/task                                  | Controlled observation |                                                                                                                                                                                                  |                                                          |                                                                                 |
|                          |                                                                                                                          | Number of errors                                                    | Number of errors / tasks                                       |                        |                                                                                                                                                                                                  |                                                          |                                                                                 |
| EFFICIENCY               |                                                                                                                          |                                                                     |                                                                |                        |                                                                                                                                                                                                  |                                                          |                                                                                 |
| Objective/<br>Subjective | Resources expended in relation to the accuracy and completeness with which users achieve goals.                          | Duration spent on each screen                                       | Seconds / milliseconds                                         | Survey                 | Indicates the ability of a user to complete their activities in the shortest possible time, also taking into account the resources (time, human commitment, costs and material resources) spent. | SUS, SUMI, CSUQ, UMUX, WAMMI                             | [47], [24], [58], [59], [27], [SR7], [35], ISO/IEC 25010:2011 [SR10]            |
|                          |                                                                                                                          | Task time                                                           |                                                                | Controlled observation |                                                                                                                                                                                                  |                                                          |                                                                                 |
|                          |                                                                                                                          | Productive Time                                                     |                                                                |                        |                                                                                                                                                                                                  |                                                          |                                                                                 |
|                          |                                                                                                                          | User's error rate                                                   | Number of user's errors/tasks                                  |                        |                                                                                                                                                                                                  |                                                          |                                                                                 |
| SATISFACTION             |                                                                                                                          |                                                                     |                                                                |                        |                                                                                                                                                                                                  |                                                          |                                                                                 |
| Subjective               | Degree to which user needs are satisfied when a product or system is used in a specified context of use.                 | Subjective rating scale of users towards services after using them. | Percentage of satisfaction                                     | Survey                 | Indicates the subjective responses (in terms of target, communication, environment) of users, both positive and negative, about their feelings when using the service.                           | SUMI, SUS, CSUQ, QUIS, UMUX, ASQ, SEQ, SMEQ, SUPR-Q, UEQ | [47], [24], [58], [59], [27], [56], [SR7], ISO/IEC 25010:2011 [SR10]            |
|                          |                                                                                                                          | Predefined statements with Likert-scale ranking.                    |                                                                |                        |                                                                                                                                                                                                  |                                                          |                                                                                 |
| UNDERSTANDABILITY        |                                                                                                                          |                                                                     |                                                                |                        |                                                                                                                                                                                                  |                                                          |                                                                                 |
| Subjective               | The degree to which the software product enables users to recognize whether the software is appropriate for their needs. | Subjective rating scale of users towards services after using them  | X                                                              | Survey                 | Indicates the ability of the system to allow the user to understand the functionalities of the service and how to use them successfully to perform particular tasks.                             | WAMMI                                                    | [58], [35]                                                                      |
|                          |                                                                                                                          | Predefined statements with Likert-scale ranking.                    |                                                                |                        |                                                                                                                                                                                                  |                                                          |                                                                                 |
| LEARNABILITY             |                                                                                                                          |                                                                     |                                                                |                        |                                                                                                                                                                                                  |                                                          |                                                                                 |
| Objective/<br>Subjective | Degree to which a product or system can be used by specified users to achieve                                            | First Time:                                                         |                                                                | Survey                 | Indicates the ability of the system to allow the user to learn the content of the service comprehensively                                                                                        | SUMI, SUS, CSUQ, WAMMI                                   | [47], [58], [27], [SR7], ISO/IEC 25010:2011 [SR10]                              |

|                       |                                                                                                                                                            |                                                                                    |                                      |                        |                                                                                                                                                                                                                                                                          |     |                                 |
|-----------------------|------------------------------------------------------------------------------------------------------------------------------------------------------------|------------------------------------------------------------------------------------|--------------------------------------|------------------------|--------------------------------------------------------------------------------------------------------------------------------------------------------------------------------------------------------------------------------------------------------------------------|-----|---------------------------------|
|                       | specified goals of learning to use the product or system with effectiveness, efficiency, freedom from risk and satisfaction in a specified context of use. |                                                                                    |                                      |                        | and to acquire knowledge and skills comfortably.                                                                                                                                                                                                                         |     |                                 |
|                       |                                                                                                                                                            | Number of attempts to solve a task                                                 | Attempts / tasks                     |                        |                                                                                                                                                                                                                                                                          |     |                                 |
|                       |                                                                                                                                                            | Number of errors performed by an user                                              |                                      |                        |                                                                                                                                                                                                                                                                          |     |                                 |
|                       |                                                                                                                                                            | Number of assists during performing a task                                         | Number of aids / tasks               |                        |                                                                                                                                                                                                                                                                          |     |                                 |
|                       |                                                                                                                                                            | Time spent on training                                                             | Seconds / milliseconds               |                        |                                                                                                                                                                                                                                                                          |     |                                 |
|                       |                                                                                                                                                            | Time task                                                                          | Seconds / milliseconds               | Controlled observation |                                                                                                                                                                                                                                                                          |     |                                 |
|                       |                                                                                                                                                            | Over Time:                                                                         |                                      |                        |                                                                                                                                                                                                                                                                          |     |                                 |
|                       |                                                                                                                                                            | Repeating similar pairs of tasks in each session.                                  | Number of similar repetitions/ tasks |                        |                                                                                                                                                                                                                                                                          |     |                                 |
|                       |                                                                                                                                                            | Duration to reach a pre-specified proficiency.                                     | Seconds/ milliseconds                |                        |                                                                                                                                                                                                                                                                          |     |                                 |
|                       |                                                                                                                                                            | Learning Curve                                                                     | Number of Wrong accessed page/task   |                        |                                                                                                                                                                                                                                                                          |     |                                 |
| <b>SAFETY</b>         |                                                                                                                                                            |                                                                                    |                                      |                        |                                                                                                                                                                                                                                                                          |     |                                 |
| Objective             | Aspects of the system related to protecting the user from dangerous conditions and undesirable situations.                                                 | Weighted sum of sub-factors (Accuracy, Privacy, Authentication , Responsibility ). | Percentage of Safety                 | Weighted-Sum           | Indicates both the totality of the measures and tools adopted by the system in order to prevent or reduce accidental events that could cause damage to people or things, and the ability of users to protect themselves by not disclosing information and personal data. | X   | [SR8], [36]                     |
| <b>SUB-ATTRIBUTES</b> |                                                                                                                                                            |                                                                                    |                                      |                        |                                                                                                                                                                                                                                                                          |     |                                 |
| <b>OPERABILITY</b>    |                                                                                                                                                            |                                                                                    |                                      |                        |                                                                                                                                                                                                                                                                          |     |                                 |
| Objective/ Subjective | Degree to which a product or system has attributes that make it easy to operate and control.                                                               | X                                                                                  | X                                    | X                      | Indicates the ability of the services to allow the user to use and control its functions.                                                                                                                                                                                | ASQ | [58], ISO/IEC 25010:2011 [SR10] |
| <b>ATTRACTIVENESS</b> |                                                                                                                                                            |                                                                                    |                                      |                        |                                                                                                                                                                                                                                                                          |     |                                 |

|                          |                                                                                                                                                                                      |                                                  |                                     |                        |                                                                                                                          |               |                                        |  |
|--------------------------|--------------------------------------------------------------------------------------------------------------------------------------------------------------------------------------|--------------------------------------------------|-------------------------------------|------------------------|--------------------------------------------------------------------------------------------------------------------------|---------------|----------------------------------------|--|
| Subjective               | The degree to which the software product is attractive to the user.                                                                                                                  | Predefined statements with Likert-scale ranking. | X                                   | Survey                 | Indicates the charm of a user interface for users involved in services.                                                  | SUPR-Q, WAMMI | [58], [35]                             |  |
| MEMORABILITY             |                                                                                                                                                                                      |                                                  |                                     |                        |                                                                                                                          |               |                                        |  |
| Objective/<br>Subjective | The degree of ease with which a user can remember how to use an application effectively.                                                                                             | Effect of response time                          |                                     | Survey                 | Indicates the level of ease with which a user can recall how to use the application after interrupting it for some time. | X             | [47], [SR8], [27], [SR7]               |  |
|                          |                                                                                                                                                                                      | Duration of pauses                               | Seconds / milliseconds              | Controlled observation |                                                                                                                          |               |                                        |  |
|                          |                                                                                                                                                                                      | Predefined statements with Likert-scale ranking. | X                                   | Visual tracking        |                                                                                                                          |               |                                        |  |
|                          |                                                                                                                                                                                      | On the second use:                               |                                     |                        |                                                                                                                          |               |                                        |  |
|                          |                                                                                                                                                                                      | Task time                                        | Seconds / milliseconds              |                        |                                                                                                                          |               |                                        |  |
|                          |                                                                                                                                                                                      | Number of navigational steps                     | Number of accessed pages/experiment |                        |                                                                                                                          |               |                                        |  |
|                          |                                                                                                                                                                                      | Number of error                                  | Number of errors/experiment         |                        |                                                                                                                          |               |                                        |  |
|                          |                                                                                                                                                                                      | Number of touch                                  | Number of touches/page/experiment   |                        |                                                                                                                          |               |                                        |  |
| FLEXIBILITY              |                                                                                                                                                                                      |                                                  |                                     |                        |                                                                                                                          |               |                                        |  |
| Subjective               | Degree to which a product or system can be used with effectiveness, efficiency, freedom from risk and satisfaction in contexts beyond those initially specified in the requirements. | Predefined statements with Likert-scale ranking. | X                                   | Survey                 | Indicates the possibility of adapting the software product to the personal preferences of users.                         | X             | [SR8], [36], ISO/IEC 25010:2011 [SR10] |  |
| COGNITIVE LOAD           |                                                                                                                                                                                      |                                                  |                                     |                        |                                                                                                                          |               |                                        |  |
| Objective/<br>Subjective | Refers to the amount of mental activity imposed on a user's working memory during application usage.                                                                                 | Fixations, gaze points and heat maps             | X                                   | Survey                 | Indicates the amount of mental energy needed by the user to use the service.                                             | NASA-TLX      | [47], [23], [SR7], [57]                |  |
|                          |                                                                                                                                                                                      | Text summarization                               | X                                   | Controlled observation |                                                                                                                          |               |                                        |  |
|                          |                                                                                                                                                                                      | Predefined statements with Likert-scale ranking. | X                                   | Visual tracking        |                                                                                                                          |               |                                        |  |
|                          |                                                                                                                                                                                      | Request of help                                  | Number of help access / experiment  |                        |                                                                                                                          |               |                                        |  |

|                          |                                                                                                                       |                                                                      |                                     |                        |                                                                                                                                   |   |                                              |
|--------------------------|-----------------------------------------------------------------------------------------------------------------------|----------------------------------------------------------------------|-------------------------------------|------------------------|-----------------------------------------------------------------------------------------------------------------------------------|---|----------------------------------------------|
|                          |                                                                                                                       | Time spent on help                                                   | Seconds / milliseconds              |                        |                                                                                                                                   |   |                                              |
|                          |                                                                                                                       | Response time                                                        | Seconds / milliseconds              |                        |                                                                                                                                   |   |                                              |
| <b>ERROR</b>             |                                                                                                                       |                                                                      |                                     |                        |                                                                                                                                   |   |                                              |
| Objective                | Refers to the amount and type of errors which occur during task performance by a user.                                | Amount and type of errors occurred                                   | Number of errors                    | Survey                 | Indicates a situation in which the user is in difficulty and is potentially unable to use the system to achieve the desired goal. | X | [47], [27], [56]                             |
|                          |                                                                                                                       | Number of errors                                                     | Number of errors/experiment         | Controlled observation |                                                                                                                                   |   |                                              |
| <b>SIMPLICITY</b>        |                                                                                                                       |                                                                      |                                     |                        |                                                                                                                                   |   |                                              |
| Objective/<br>Subjective | Degree to which a system or component has a design and implementation that is straightforward and easy to understand. | Number of performed gestures to reach a destination object.          | X                                   | Survey                 | Indicates the ease of understanding or ease of use of the service.                                                                | X | [47], [27], [SR7], ISO/IEC/IEEE 24765 [SR12] |
|                          |                                                                                                                       | Duration of searching a button to perform a specific function        | Seconds                             | Controlled observation |                                                                                                                                   |   |                                              |
|                          |                                                                                                                       | Predefined statements with Likert-scale ranking                      | X                                   | Interview              |                                                                                                                                   |   |                                              |
|                          |                                                                                                                       | Number of errors                                                     | Number of errors/experiment         |                        |                                                                                                                                   |   |                                              |
|                          |                                                                                                                       | Number of touches to finish task                                     | Number of touches/page/experiment   |                        |                                                                                                                                   |   |                                              |
|                          |                                                                                                                       | Number of navigated pages task                                       | Number of accessed pages/experiment |                        |                                                                                                                                   |   |                                              |
| <b>PRIVACY</b>           |                                                                                                                       |                                                                      |                                     |                        |                                                                                                                                   |   |                                              |
| Subjective               | The ability of individuals to maintain control of their personal information.                                         | X                                                                    | X                                   | X                      | Indicates the right to have some control over the collection and use of one's personal information.                               | X | [44]                                         |
| <b>AUTHENTICATION</b>    |                                                                                                                       |                                                                      |                                     |                        |                                                                                                                                   |   |                                              |
| Objective                | Formalized process of verification that, if successful, results in an authenticated identity for an entity.           | Number of Authentication Threats / Blocked / Number of Total Threats | Percentage of Authentication        | Controlled observation | Indicates the process of verifying the user's identity by the service provider.                                                   | X | ISO/IEC 24760-1:2019 [SR11], [SR6]           |
| <b>ACCURACY</b>          |                                                                                                                       |                                                                      |                                     |                        |                                                                                                                                   |   |                                              |

|                       |                                                                                                                       |                                                                        |                        |                        |                                                                                     |   |                                       |
|-----------------------|-----------------------------------------------------------------------------------------------------------------------|------------------------------------------------------------------------|------------------------|------------------------|-------------------------------------------------------------------------------------|---|---------------------------------------|
| Objective             | The degree to which the software product provides the right or specified results with the needed degree of precision. | Ratio between the service that is expected and that which is observed. | Percentage of Accuracy | Controlled observation | Indicates the correctness, precision and rigor with which the results are provided. | X | [55], [35]                            |
| <b>ACCOUNTABILITY</b> |                                                                                                                       |                                                                        |                        |                        |                                                                                     |   |                                       |
| Objective             | The degree to which the actions of an entity can be traced uniquely to the entity.                                    | X                                                                      | X                      | X                      | Indicates the ability to trace the actions of the service.                          | X | [55], [35], ISO/IEC 25010:2011 [SR10] |

**Supplementary Table S11. User Experience attributes.** The table describes some of the possible attributes that characterize the user experience evaluation indicating both the definition and the information provided. Differently from the case of Usability and Acceptability, the approach, the measurement method and the metric are the same for all attributes due to the extremely subjective nature of this concept.

| <b>USER EXPERIENCE</b>                                                                                                                                                                                                             |                                                                                                                                 |                                   |
|------------------------------------------------------------------------------------------------------------------------------------------------------------------------------------------------------------------------------------|---------------------------------------------------------------------------------------------------------------------------------|-----------------------------------|
| <b>APPROACH:</b>                                                                                                                                                                                                                   | Subjective                                                                                                                      |                                   |
| <b>METHOD OF MEASUREMENT:</b>                                                                                                                                                                                                      | Survey/Interview                                                                                                                |                                   |
| <b>METRIC:</b>                                                                                                                                                                                                                     | Predefined statements with Likert-scale ranking                                                                                 |                                   |
|                                                                                                                                                                                                                                    | Subjective rating scale of users towards services after using them                                                              |                                   |
| <b>DEFINITION</b>                                                                                                                                                                                                                  | <b>INFORMATION</b>                                                                                                              | <b>REFERENCES</b>                 |
| <b>ATTRIBUTE: USABILITY</b>                                                                                                                                                                                                        |                                                                                                                                 |                                   |
| Degree to which a product or system can be used by specified users to achieve specified goals with effectiveness, efficiency and satisfaction in a specified context of use.                                                       | Indicates the ability of a software product or system to be understood, learned, used, as well as its ability to attract users. | ISO/IEC 25010:2011 [SR10], [SR14] |
| <b>ATTRIBUTE: USEFULNESS</b>                                                                                                                                                                                                       |                                                                                                                                 |                                   |
| The degree to which a person believes that using a particular technology would enhance his or her job performance.                                                                                                                 | Indicates the ability of a system to be used advantageously by the user to satisfy present or future needs.                     | [SR4], [SR14]                     |
| <b>ATTRIBUTE: CREDIBILITY</b>                                                                                                                                                                                                      |                                                                                                                                 |                                   |
| The degree to which data has attributes that are regarded as true and believable by users in a specific context of use. Credibility includes the concept of authenticity (the truthfulness of origins, attributions, commitments). | Credibility is about both the information (correlation, relevance, correct syntax) and the design or functionality available.   | ISO/IEC 25012:2008 [SR13], [SR14] |
| <b>ATTRIBUTE: ACCESSIBILITY</b>                                                                                                                                                                                                    |                                                                                                                                 |                                   |
| Degree to which a product or system can be used by people with the widest range of characteristics and capabilities to achieve a specified goal in a specified context of use.                                                     | Indicates the ability of the service to be perceived, understood and used by people with disabilities.                          | ISO/IEC 25010:2011 [SR10], [SR14] |
| <b>ATTRIBUTE: FINDABILITY</b>                                                                                                                                                                                                      |                                                                                                                                 |                                   |
| The degree to which a particular object is easy to discover or locate.                                                                                                                                                             | Indicates the ability for users to easily locate the resource or service they are looking for.                                  | [SR9], [SR14]                     |
| <b>ATTRIBUTE: DESIRABILITY</b>                                                                                                                                                                                                     |                                                                                                                                 |                                   |
| Attraction that an asset exercises due to the fact that it is considered suitable to satisfy a given need.                                                                                                                         | Indicates a product or service that the user would like to own.                                                                 | [SR14]                            |
| <b>ATTRIBUTE: VALUABLE</b>                                                                                                                                                                                                         |                                                                                                                                 |                                   |
| Everything that is particularly appreciated and considered, both because it has valuable characteristics, and because it                                                                                                           | Indicates both something that has a certain value, both economic and sentimental, and something that is essential for the user. | [SR14]                            |

|                                                                                       |  |  |
|---------------------------------------------------------------------------------------|--|--|
| is necessary or even indispensable in certain circumstances and for certain purposes. |  |  |
|---------------------------------------------------------------------------------------|--|--|

In this Supplementary file we have cited some references of the manuscript with the same number of the Section Reference. Moreover, we have cited additional references, not included in the manuscript, here, reported as SR and listed in the following Supplementary Reference section.

## Supplementary Reference List

**SR1.** H. S. Kwon and L. Chidambaram, “A test of the technology acceptance model: The case of cellular telephone adoption,” in Proceedings of the 33rd Annual Hawaii International Conference on System Sciences. IEEE, 2000, pp. 7–pp.

**SR2.** H.-C. Kim, “Acceptability engineering: the study of user acceptance of innovative technologies,” Journal of applied research and technology, vol. 13, no. 2, pp. 230–237, 2015.

**SR3.** Y. Malhotra and D. F. Galletta, “Extending the technology acceptance model to account for social influence: Theoretical bases and empirical validation,” in Proceedings of the 32nd Annual Hawaii International Conference on Systems Sciences. 1999. HICSS-32. Abstracts and CD-ROM of Full Papers. IEEE, 1999, pp. 14–pp.

**SR4.** M. A. Babar, D. Winkler, and S. Biffl, “Evaluating the usefulness and ease of use of a group-ware tool for the software architecture evaluation process,” in First International Symposium on Empirical Software Engineering and Measurement (ESEM 2007). IEEE, 2007, pp. 430–439.

**SR5.** A. Seffah, N. Kececi, and M. Donyaee, “Quim: a framework for quantifying usability metrics in software quality models,” in Proceedings Second Asia-Pacific Conference on Quality Software. IEEE, 2001, pp. 311–318.

**SR6.** E. Serrelis and N. Alexandris, “An empirical model for quantifying security based on services,” in 2007 International Multi-Conference on Computing in the Global Information Technology (ICCGI’07). IEEE, 2007, pp. 30–30.

**SR7.** E. Kaur and P. D. Haghighi, “A context-aware usability model for mobile health applications,” in Proceedings of the 14th International Conference on Advances in Mobile Computing and Multi Media, 2016, pp. 181–189.

**SR8.** H. Petrie and N. Bevan, “The evaluation of accessibility, usability, and user experience.” The universal access handbook, vol. 1, pp. 1–16, 2009.

**SR9.** Z. Gao, Y. Gao, and J. Yu, “What makes it findable? an exploration on user search behaviour and the findability of technical documentation,” in 2020 IEEE International Professional Communication Conference (ProComm). IEEE, 2020, pp. 154–160.

**SR10.** I. J. S. Software and systems engineering. (2011) ISO/IEC 25010:2011(en) systems and software engineering — systems and software quality requirements and evaluation (square) — system and software quality models. [Online]. Available: <https://www.iso.org/standard/35733.html>

**SR11.** c. ISO/IEC JTC 1/SC 27 Information security and privacy protection. (2019) Iso/iec24760-1:2019(en) it security and privacy — a framework for identity management — part 1: Terminology and concepts. [Online]. Available: <https://www.iso.org/standard/77582.html>

**SR12.** I.J.S. Software and systems engineering. (2017) Iso/iec/ieee24765: 2017(en) systems and software engineering — vocabulary. [Online]. Available: <https://www.iso.org/standard/71952.html>

**SR13.** (2008) Iso/iec 25012:2008(en) software engineering — software product quality requirements and evaluation (square) — data quality model. [Online]. Available: <https://iso25000.com/index.php/en/iso-25000-standards/iso-25012>

**SR14.** P. Morville and P. Sullenger, “Ambient findability: libraries, serials, and the internet of things,” The serials librarian, vol. 58, no. 1-4, pp. 33–38, 2010.
